# Supplementary material for: An Evaluation of Cesium Removal from Simulated Radioactive Contaminated Soil with a Magnetized Zeolite Derived from Anthracite
Source: MDPI journal article supplement (doi:10.3390/app132212192), 2023-11-10
Supplement: s1 [file s1]

**Supplemental Information:****Table S1 XRF measures fly ash composition after alkaline washing (wt%)**

| <b>Sample<br/>number</b> | <b>SiO<sub>2</sub></b> | <b>Al<sub>2</sub>O<sub>3</sub></b> | <b>Fe<sub>2</sub>O<sub>3</sub></b> | <b>K<sub>2</sub>O</b> | <b>TiO<sub>2</sub></b> | <b>Na<sub>2</sub>O</b> | <b>MgO</b> | <b>CaO</b> | <b>P<sub>2</sub>O<sub>5</sub></b> | <b>MnO</b> |
|--------------------------|------------------------|------------------------------------|------------------------------------|-----------------------|------------------------|------------------------|------------|------------|-----------------------------------|------------|
| FA-1-1                   | 57.390                 | 30.530                             | 3.580                              | 2.250                 | 0.857                  | 2.100                  | 1.440      | 1.230      | 0.149                             | 0.036      |
| FA-1-2                   | 56.700                 | 29.790                             | 3.510                              | 2.480                 | 0.825                  | 2.890                  | 1.420      | 1.190      | 0.144                             | 0.034      |
| FA-1-3                   | 56.200                 | 30.270                             | 3.630                              | 2.470                 | 0.828                  | 2.940                  | 1.380      | 1.230      | 0.156                             | 0.035      |
| FA-1-4                   | 56.510                 | 30.090                             | 3.750                              | 2.500                 | 0.842                  | 2.680                  | 1.340      | 1.240      | 0.153                             | 0.036      |
| FB-1-1                   | 48.650                 | 30.170                             | 1.980                              | 1.390                 | 0.904                  | 1.100                  | 0.539      | 0.498      | 0.042                             | 0.014      |
| FB-1-2                   | 45.610                 | 29.440                             | 1.760                              | 1.440                 | 0.869                  | 1.050                  | 0.501      | 0.439      | 0.040                             | 0.013      |
| FB-1-3                   | 49.780                 | 33.290                             | 2.040                              | 3.500                 | 0.967                  | 3.950                  | 0.562      | 0.495      | 0.046                             | 0.013      |
| FB-1-4                   | 46.230                 | 31.500                             | 2.030                              | 5.040                 | 0.935                  | 7.230                  | 0.546      | 0.473      | 0.044                             | 0.013      |

**Table S2 The Cs<sup>+</sup> removal ratio and magnetized zeolite recovery ratio**

| Magnetized zeolite recovery ratio: $W_r / W_0$ (%)     |             |             |           |
|--------------------------------------------------------|-------------|-------------|-----------|
|                                                        | Coarse soil | Medium soil | Fine soil |
| Coarse zeolite (1-3 mm)                                | 95.09       | 94.55       | 96.36     |
| Medium zeolite (60-80 mesh)                            | 92.00       | 90.46       | 77.55     |
| Fine zeolite (120 mesh)                                | 89.82       | 66.19       | 85.36     |
| Cs <sup>+</sup> removal ratio ( $g/g$ , $C_{Cs}$ ) (%) |             |             |           |
|                                                        | Coarse soil | Medium soil | Fine soil |
| Coarse zeolite (1-3 mm)                                | 99.84       | 99.8        | 99.63     |
| Medium zeolite (60-80 mesh)                            | 99.91       | 99.92       | 99.87     |
| Fine zeolite (120 mesh)                                | 99.48       | 99.74       | 99.7      |

**Table S3 The Cs<sup>+</sup> removal efficiency compare to literature**

|    | method                                | Cs concentration | Addition ratio | Cs removal efficiency (%) | reference       |
|----|---------------------------------------|------------------|----------------|---------------------------|-----------------|
| 1  | PEI-Fe <sub>3</sub> O <sub>4</sub>    | 1630 Bq/kg       | 0.015:1        | 73.5                      | Kim (2021)      |
| 2  | aminopolycarboxylate chelators (APCs) | 40mg/kg          | 10:1           | 46                        | Sawai (2017)    |
| 3  | washing-electrokinetic                | 10 Bq/kg         | -              | 97.4                      | Kim (2012)      |
| 4  | weathered biotite                     | -                | -              | 45                        | Honda (2017)    |
| 5  | Indian mustard                        | 13.4 Bq/kg       | -              | 50                        | Fuhrmann (2002) |
| 6  | K based washing                       | 1.47 mg/kg       | 20:1           | 81.3                      | Song(2023)      |
| 7  | hydrothermal treated clay             | 269 mmol/kg      |                | 96                        | Yin (2018)      |
| 8  | PB/Fe <sub>3</sub> O <sub>4</sub> /GO | -                | -              | 80                        | Yang (2014)     |
| 9  | supercritical CO <sub>2</sub>         | -                | -              | 95                        | Leybros (2016)  |
| 10 | A.Thiooxidans sp bacteria             | -                | -              | 96                        | kim (2021)      |
| 11 | magnetized zeolite (current study)    | 10 mg/g          | 0.5:1          | 99.92                     | Zhang (2023)    |
